# Supplementary material for: Concentrations of Plasma Amino Acids and Neurotransmitters in Participants with Functional Gut Disorders and Healthy Controls
Source: MDPI journal article supplement (doi:10.3390/metabo13020313), 2023-02-20
Supplement: s1 [file s1]

Supplementary Figures:

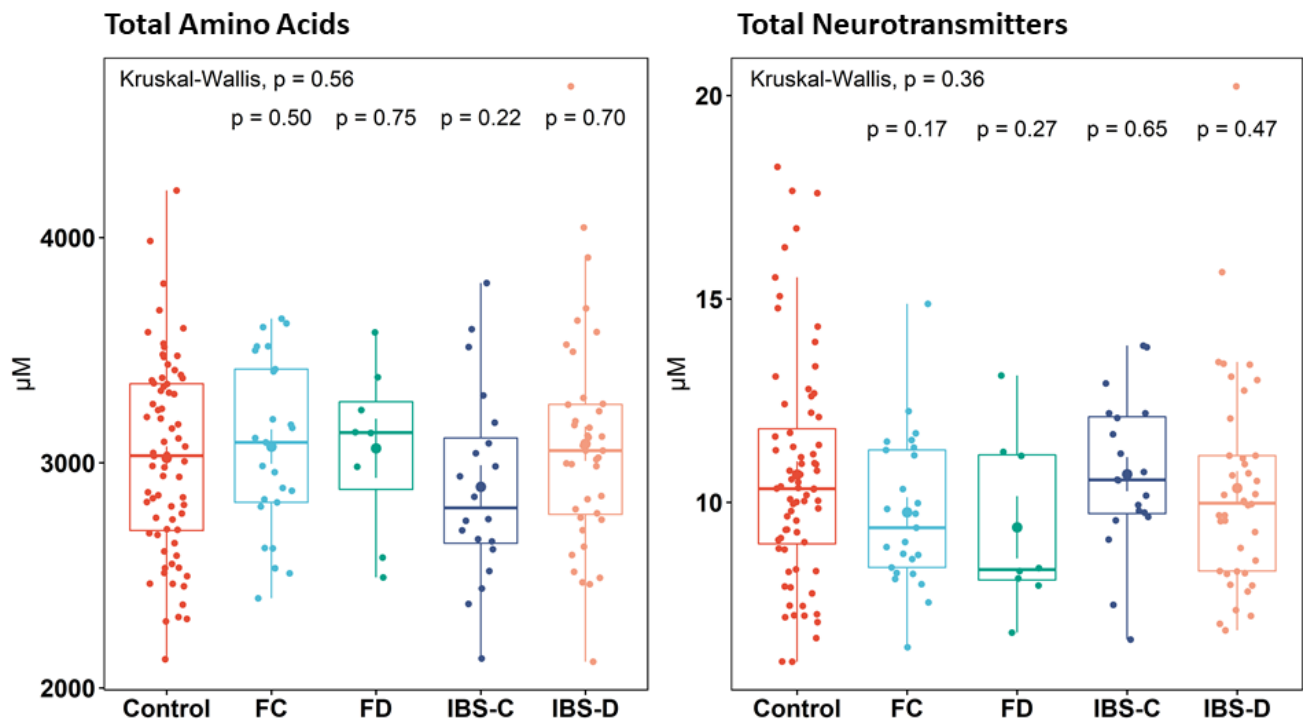

Supplementary Figure 1: Total sum of all amino acids (including non-proteogenic) and all neurotransmitters between healthy control, IBS subtypes, and functional groups. Top significance value denotes the overall significance between all groups. Individual group significance values are pairwise comparisons between healthy controls and the group. Boxplots show median (centre line), 25<sup>th</sup> and 75<sup>th</sup> percentile (top and bottom of boxes, respectively), with whiskers representing 1.5 times the inter-quartile range. Abbreviations: healthy control (control), functional constipation (FC), IBS-constipation (IBS-C), functional diarrhea (FD), IBS-diarrhea (IBS-D).

## Derivatization Schematic

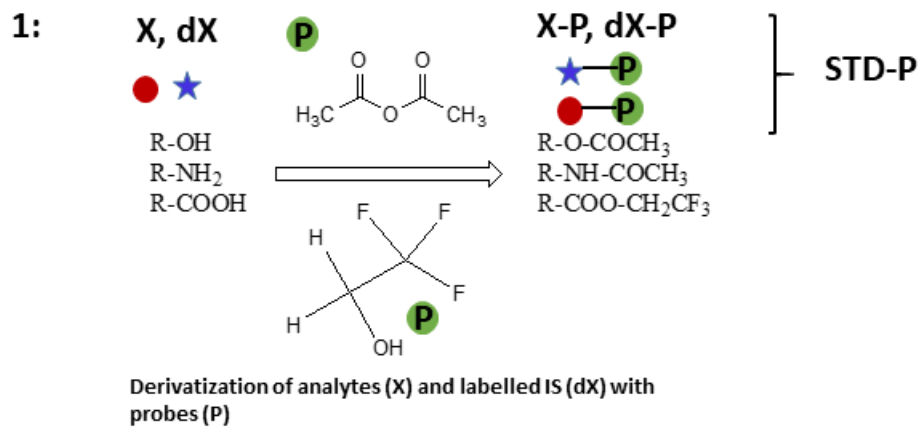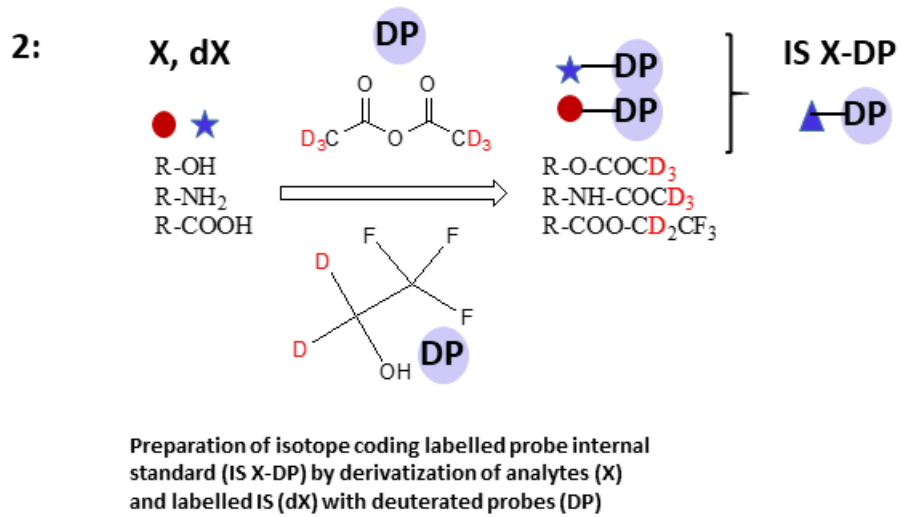

Supplementary Figure 2: Derivatization schematic for plasma neurotransmitter analysis.

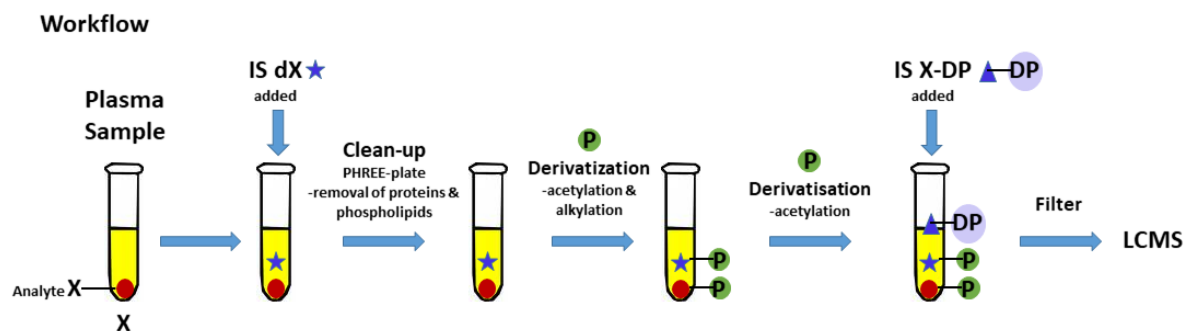

Supplementary Figure 3: Derivatization workflow for plasma neurotransmitter analysis.



Supplementary Table 1: Output of spearman's rank sum correlation test for healthy control group. Values shown as Rho/significance value.

|       | PEA        | DOPA       | DA         | X3MT       | DOPAC      | HVA        | NE         | DHPG       | MHPG       | NM         | E          | MN         | VMA        | KYN        | 5.HTP      | 5.HT       | 5.HIAA    | AABA       | GABA       |
|-------|------------|------------|------------|------------|------------|------------|------------|------------|------------|------------|------------|------------|------------|------------|------------|------------|-----------|------------|------------|
| ASP   | -0.26/0.03 | -0.14/0.25 | 0.19/0.11  | 0.06/0.60  | -0.20/0.10 | 0.22/0.07  | 0.02/0.85  | 0.06/0.62  | 0.06/0.62  | 0.05/0.70  | -0.16/0.17 | 0.24/0.04  | 0.21/0.08  | -0.20/0.09 | -0.10/0.38 | 0.29/0.01  | 0.20/0.09 | 0.06/0.62  | 0.31/0.01  |
| GLU   | -0.20/0.10 | -0.12/0.30 | 0.28/0.02  | 0.13/0.26  | -0.08/0.49 | 0.18/0.12  | -0.11/0.37 | -0.19/0.12 | -0.10/0.38 | 0.13/0.27  | -0.19/0.11 | 0.07/0.55  | 0.06/0.60  | -0.05/0.65 | -0.04/0.73 | -0.07/0.57 | 0.23/0.06 | 0.15/0.20  | 0.27/0.02  |
| HyPro | 0.03/0.79  | -0.07/0.54 | 0.14/0.24  | 0.17/0.16  | 0.10/0.41  | 0.28/0.02  | -0.06/0.61 | -0.18/0.12 | -0.13/0.28 | -0.10/0.41 | -0.22/0.07 | 0.24/0.04  | 0.04/0.72  | 0.01/0.93  | -0.08/0.49 | -0.05/0.65 | 0.09/0.47 | 0.17/0.15  | 0.22/0.06  |
| SER   | -0.07/0.56 | 0.15/0.21  | 0.14/0.25  | -0.01/0.93 | 0.01/0.93  | 0.05/0.69  | 0.31/0.01  | 0.34/0.00  | 0.13/0.28  | 0.01/0.91  | 0.22/0.07  | 0.14/0.24  | 0.05/0.65  | 0.00/0.97  | 0.19/0.10  | 0.29/0.02  | 0.04/0.72 | -0.04/0.73 | -0.16/0.18 |
| ASN   | -0.16/0.19 | 0.22/0.06  | 0.13/0.26  | -0.03/0.81 | 0.15/0.22  | 0.13/0.26  | 0.34/0.00  | 0.36/0.00  | 0.08/0.48  | -0.02/0.88 | 0.21/0.07  | 0.25/0.03  | 0.24/0.04  | 0.14/0.25  | 0.29/0.01  | 0.27/0.02  | 0.13/0.29 | 0.03/0.80  | -0.04/0.75 |
| GLY   | -0.07/0.55 | 0.14/0.24  | -0.01/0.94 | 0.07/0.53  | 0.03/0.83  | -0.04/0.73 | 0.11/0.35  | 0.09/0.47  | 0.00/1.00  | -0.29/0.01 | 0.11/0.36  | -0.04/0.73 | 0.08/0.53  | 0.06/0.62  | -0.07/0.58 | 0.01/0.93  | 0.08/0.53 | 0.01/0.92  | -0.02/0.85 |
| GLN   | -0.03/0.80 | 0.15/0.21  | 0.07/0.58  | -0.05/0.69 | 0.04/0.75  | -0.08/0.49 | 0.28/0.02  | 0.14/0.24  | 0.04/0.73  | -0.07/0.54 | 0.02/0.87  | 0.05/0.70  | 0.11/0.34  | -0.03/0.78 | 0.13/0.28  | 0.09/0.46  | 0.12/0.30 | 0.03/0.82  | -0.13/0.29 |
| HIS   | 0.03/0.83  | 0.04/0.73  | 0.20/0.10  | 0.06/0.62  | -0.07/0.56 | -0.12/0.33 | 0.14/0.26  | -0.02/0.90 | 0.02/0.89  | 0.04/0.75  | -0.02/0.87 | 0.15/0.21  | -0.13/0.29 | -0.02/0.88 | 0.14/0.24  | 0.19/0.12  | 0.19/0.11 | 0.04/0.76  | 0.10/0.40  |
| TAU   | -0.15/0.21 | 0.08/0.52  | 0.10/0.41  | 0.01/0.96  | -0.23/0.05 | 0.08/0.49  | 0.33/0.00  | 0.32/0.01  | 0.35/0.00  | 0.08/0.50  | 0.13/0.29  | 0.02/0.86  | 0.33/0.00  | -0.15/0.20 | -0.02/0.84 | 0.43/0.00  | 0.28/0.02 | -0.06/0.61 | 0.22/0.07  |
| CIT   | 0.10/0.40  | -0.25/0.03 | 0.05/0.65  | -0.08/0.52 | -0.10/0.39 | -0.09/0.43 | -0.01/0.90 | 0.09/0.45  | 0.01/0.90  | 0.08/0.49  | -0.01/0.91 | 0.12/0.30  | 0.22/0.06  | -0.11/0.37 | -0.17/0.15 | -0.03/0.81 | 0.02/0.90 | 0.05/0.67  | 0.16/0.18  |
| THR   | 0.01/0.92  | 0.08/0.52  | 0.06/0.60  | -0.03/0.83 | 0.14/0.23  | 0.01/0.94  | 0.12/0.31  | 0.03/0.79  | -0.10/0.41 | -0.08/0.48 | 0.09/0.45  | 0.26/0.03  | 0.00/0.98  | 0.16/0.19  | 0.17/0.15  | 0.08/0.49  | 0.14/0.25 | 0.19/0.11  | 0.03/0.77  |
| ALA   | -0.11/0.34 | -0.01/0.94 | 0.13/0.27  | -0.08/0.53 | -0.01/0.91 | 0.12/0.30  | 0.02/0.88  | -0.05/0.66 | -0.20/0.10 | -0.03/0.83 | -0.19/0.10 | 0.11/0.37  | 0.19/0.10  | 0.01/0.92  | 0.19/0.10  | 0.09/0.47  | 0.19/0.12 | -0.04/0.73 | 0.09/0.48  |
| ARG   | -0.15/0.22 | 0.01/0.95  | 0.07/0.54  | 0.06/0.59  | -0.05/0.70 | 0.02/0.86  | 0.22/0.07  | 0.10/0.40  | -0.01/0.96 | 0.01/0.96  | 0.00/0.97  | 0.15/0.19  | 0.03/0.82  | -0.03/0.78 | 0.14/0.23  | 0.11/0.36  | 0.10/0.42 | -0.03/0.82 | 0.04/0.74  |
| PRO   | -0.22/0.06 | 0.10/0.40  | 0.18/0.14  | 0.16/0.17  | 0.22/0.06  | 0.23/0.05  | 0.10/0.40  | 0.15/0.21  | -0.08/0.52 | -0.05/0.68 | -0.07/0.57 | 0.09/0.43  | 0.23/0.05  | 0.09/0.44  | 0.15/0.21  | 0.12/0.31  | 0.18/0.14 | 0.10/0.40  | 0.26/0.03  |
| TYR   | -0.18/0.12 | 0.26/0.02  | 0.06/0.60  | 0.14/0.25  | 0.26/0.03  | 0.17/0.16  | 0.13/0.28  | 0.08/0.49  | -0.02/0.86 | 0.11/0.36  | 0.06/0.61  | 0.11/0.35  | 0.17/0.15  | 0.35/0.00  | 0.36/0.00  | 0.00/0.97  | 0.15/0.22 | 0.13/0.28  | 0.18/0.13  |
| VAL   | -0.22/0.07 | 0.15/0.22  | 0.19/0.11  | 0.07/0.59  | 0.22/0.06  | 0.18/0.13  | 0.07/0.53  | 0.01/0.95  | -0.12/0.30 | 0.08/0.53  | -0.03/0.81 | 0.18/0.14  | -0.05/0.69 | 0.28/0.02  | 0.32/0.01  | -0.12/0.33 | 0.15/0.20 | 0.08/0.51  | 0.15/0.22  |
| MET   | -0.09/0.43 | 0.11/0.34  | 0.08/0.52  | 0.03/0.79  | 0.12/0.33  | 0.05/0.65  | 0.09/0.46  | 0.00/0.97  | -0.12/0.33 | -0.01/0.97 | 0.14/0.25  | 0.20/0.09  | -0.02/0.87 | 0.25/0.03  | 0.27/0.02  | 0.12/0.33  | 0.10/0.40 | 0.10/0.39  | 0.02/0.86  |
| ILE   | -0.22/0.06 | 0.15/0.21  | 0.17/0.14  | 0.10/0.41  | 0.17/0.15  | 0.17/0.15  | 0.09/0.47  | 0.00/0.97  | -0.11/0.37 | 0.04/0.72  | -0.02/0.87 | 0.23/0.05  | -0.06/0.62 | 0.26/0.03  | 0.36/0.00  | -0.03/0.81 | 0.14/0.23 | 0.07/0.55  | 0.14/0.25  |
| LEU   | -0.26/0.03 | 0.19/0.11  | 0.16/0.18  | 0.10/0.38  | 0.24/0.04  | 0.14/0.23  | 0.11/0.38  | 0.02/0.84  | -0.11/0.37 | 0.06/0.62  | 0.04/0.72  | 0.20/0.09  | -0.02/0.89 | 0.32/0.01  | 0.40/0.00  | -0.06/0.63 | 0.17/0.15 | 0.09/0.46  | 0.15/0.22  |
| ORN   | 0.08/0.49  | -0.05/0.68 | 0.06/0.64  | -0.03/0.77 | 0.08/0.52  | 0.10/0.42  | 0.05/0.67  | -0.11/0.36 | -0.04/0.72 | -0.05/0.68 | -0.03/0.79 | 0.11/0.37  | 0.00/0.99  | 0.05/0.70  | -0.09/0.43 | 0.04/0.73  | 0.08/0.49 | 0.26/0.03  | 0.10/0.39  |
| PHE   | -0.10/0.39 | 0.16/0.18  | 0.20/0.09  | 0.07/0.55  | 0.10/0.41  | 0.11/0.34  | 0.10/0.39  | 0.03/0.79  | -0.03/0.77 | 0.09/0.43  | 0.00/0.99  | 0.07/0.54  | 0.04/0.76  | 0.21/0.08  | 0.25/0.03  | 0.04/0.72  | 0.17/0.16 | 0.16/0.17  | 0.15/0.21  |
| LYS   | -0.12/0.31 | 0.12/0.33  | 0.05/0.65  | 0.00/0.97  | 0.17/0.16  | 0.05/0.71  | 0.06/0.63  | 0.00/0.97  | -0.17/0.15 | 0.02/0.87  | -0.07/0.56 | 0.17/0.16  | -0.08/0.48 | 0.23/0.05  | 0.28/0.02  | -0.05/0.69 | 0.09/0.47 | 0.05/0.66  | 0.06/0.60  |
| TRP   | 0.19/0.10  | -0.06/0.62 | 0.05/0.69  | 0.04/0.73  | 0.13/0.28  | 0.10/0.38  | 0.16/0.17  | -0.02/0.89 | -0.01/0.96 | 0.18/0.13  | 0.06/0.61  | 0.19/0.11  | -0.01/0.95 | 0.06/0.64  | 0.07/0.58  | 0.04/0.73  | 0.05/0.68 | 0.10/0.39  | -0.19/0.11 |

Supplementary Table 2: Output of spearman's rank sum correlation test for constipation group (FC &amp; IBS-C). Values shown as Rho/significance value.

|       | PEA        | DOPA       | DA        | X3MT      | DOPAC      | HVA        | NE         | DHPG       | MHPG       | NM        | E          | MN         | VMA        | KYN        | 5.HTP      | 5.HT       | X.HIAA    | AABA       | GABA       |
|-------|------------|------------|-----------|-----------|------------|------------|------------|------------|------------|-----------|------------|------------|------------|------------|------------|------------|-----------|------------|------------|
| ASP   | -0.05/0.73 | 0.06/0.69  | 0.18/0.24 | 0.26/0.08 | -0.08/0.62 | -0.02/0.91 | 0.04/0.80  | -0.22/0.14 | -0.21/0.17 | 0.01/0.96 | -0.02/0.88 | -0.08/0.62 | 0.05/0.76  | -0.10/0.50 | -0.21/0.17 | 0.34/0.02  | 0.04/0.80 | 0.08/0.58  | 0.08/0.59  |
| GLU   | 0.32/0.03  | -0.38/0.01 | 0.01/0.93 | 0.05/0.74 | -0.11/0.48 | -0.02/0.88 | -0.09/0.54 | -0.30/0.05 | -0.45/0.00 | 0.10/0.53 | -0.08/0.60 | 0.15/0.32  | -0.20/0.18 | -0.15/0.32 | -0.32/0.03 | -0.06/0.70 | 0.02/0.89 | -0.14/0.34 | -0.29/0.06 |
| HyPro | -0.13/0.39 | 0.10/0.51  | 0.30/0.05 | 0.35/0.02 | 0.09/0.57  | 0.10/0.50  | 0.09/0.56  | 0.24/0.11  | 0.15/0.34  | 0.03/0.84 | -0.07/0.65 | -0.08/0.62 | 0.23/0.13  | -0.05/0.73 | 0.06/0.70  | 0.15/0.34  | 0.25/0.10 | 0.10/0.52  | 0.23/0.13  |

|     |            |            |            |            |            |            |            |            |            |            |            |            |           |            |            |            |            |            |            |
|-----|------------|------------|------------|------------|------------|------------|------------|------------|------------|------------|------------|------------|-----------|------------|------------|------------|------------|------------|------------|
| SER | 0.02/0.91  | 0.42/0.00  | 0.12/0.42  | 0.00/0.99  | 0.29/0.06  | 0.32/0.04  | 0.15/0.31  | 0.30/0.04  | 0.26/0.08  | -0.10/0.51 | 0.27/0.08  | -0.35/0.02 | 0.33/0.03 | 0.27/0.07  | 0.11/0.48  | 0.08/0.62  | -0.02/0.90 | 0.24/0.11  | 0.18/0.23  |
| ASN | -0.28/0.06 | 0.46/0.00  | 0.26/0.09  | 0.19/0.21  | 0.13/0.38  | 0.32/0.03  | 0.21/0.16  | 0.33/0.03  | 0.37/0.01  | 0.09/0.56  | 0.17/0.26  | -0.17/0.26 | 0.46/0.00 | 0.30/0.05  | 0.37/0.01  | 0.15/0.31  | 0.08/0.58  | 0.44/0.00  | 0.61/0.00  |
| GLY | 0.26/0.08  | 0.01/0.95  | -0.08/0.59 | -0.27/0.07 | 0.29/0.05  | -0.05/0.73 | -0.05/0.75 | 0.08/0.59  | 0.11/0.48  | -0.14/0.36 | 0.28/0.07  | -0.23/0.13 | 0.03/0.82 | 0.17/0.25  | -0.15/0.33 | 0.01/0.94  | -0.12/0.44 | -0.06/0.71 | -0.03/0.85 |
| GLN | 0.14/0.37  | 0.13/0.39  | 0.10/0.50  | 0.09/0.54  | 0.13/0.39  | 0.28/0.06  | 0.20/0.18  | 0.04/0.79  | 0.09/0.58  | 0.06/0.70  | 0.32/0.03  | -0.21/0.16 | 0.19/0.20 | 0.17/0.27  | -0.01/0.96 | 0.10/0.50  | 0.03/0.84  | -0.05/0.74 | 0.05/0.72  |
| HIS | -0.10/0.53 | 0.23/0.13  | 0.21/0.17  | 0.14/0.35  | 0.13/0.39  | 0.32/0.03  | 0.11/0.47  | 0.08/0.58  | 0.22/0.14  | 0.06/0.70  | 0.33/0.03  | -0.12/0.45 | 0.29/0.05 | 0.15/0.32  | 0.19/0.20  | 0.21/0.16  | 0.12/0.43  | 0.18/0.24  | 0.33/0.02  |
| TAU | -0.16/0.30 | 0.15/0.32  | 0.11/0.46  | 0.21/0.17  | -0.15/0.34 | -0.16/0.29 | 0.12/0.44  | 0.05/0.75  | -0.02/0.89 | 0.01/0.94  | 0.09/0.58  | -0.06/0.69 | 0.00/0.99 | -0.09/0.57 | -0.05/0.76 | 0.46/0.00  | -0.07/0.65 | 0.08/0.58  | 0.11/0.48  |
| CIT | 0.30/0.04  | -0.09/0.57 | 0.08/0.59  | -0.10/0.53 | 0.22/0.15  | 0.17/0.26  | -0.15/0.34 | -0.01/0.94 | 0.06/0.69  | -0.07/0.65 | 0.22/0.15  | -0.04/0.77 | 0.16/0.30 | 0.16/0.29  | -0.03/0.82 | 0.13/0.41  | 0.06/0.71  | 0.01/0.96  | -0.10/0.51 |
| THR | 0.00/0.99  | 0.15/0.34  | 0.26/0.08  | 0.21/0.17  | 0.10/0.49  | 0.46/0.00  | 0.14/0.37  | 0.31/0.04  | 0.22/0.15  | 0.20/0.20  | 0.14/0.37  | 0.03/0.86  | 0.40/0.01 | 0.24/0.11  | 0.23/0.12  | 0.10/0.50  | 0.17/0.27  | 0.28/0.06  | 0.38/0.01  |
| ALA | 0.05/0.74  | 0.04/0.81  | 0.23/0.13  | 0.26/0.08  | -0.21/0.17 | 0.16/0.30  | 0.14/0.37  | 0.18/0.25  | 0.28/0.06  | 0.23/0.13  | 0.16/0.30  | -0.06/0.69 | 0.48/0.00 | -0.14/0.36 | -0.02/0.88 | 0.24/0.12  | 0.08/0.60  | -0.04/0.81 | 0.27/0.07  |
| ARG | 0.17/0.26  | 0.19/0.21  | 0.05/0.76  | -0.03/0.85 | 0.44/0.00  | 0.31/0.04  | -0.04/0.79 | 0.23/0.13  | 0.09/0.58  | -0.23/0.13 | 0.36/0.01  | -0.33/0.03 | 0.27/0.07 | 0.16/0.29  | -0.12/0.44 | 0.14/0.34  | -0.04/0.79 | 0.14/0.36  | -0.07/0.63 |
| PRO | -0.06/0.71 | 0.04/0.81  | 0.24/0.11  | 0.24/0.11  | -0.12/0.43 | 0.26/0.08  | 0.05/0.75  | 0.12/0.44  | 0.01/0.95  | 0.17/0.26  | 0.16/0.30  | 0.08/0.62  | 0.33/0.03 | 0.08/0.60  | 0.20/0.19  | 0.13/0.38  | 0.13/0.39  | 0.07/0.65  | 0.38/0.01  |
| TYR | 0.08/0.62  | 0.33/0.03  | 0.26/0.08  | 0.26/0.08  | 0.14/0.34  | 0.36/0.01  | 0.11/0.46  | 0.08/0.61  | 0.00/1.00  | 0.27/0.08  | 0.30/0.04  | -0.10/0.53 | 0.47/0.00 | 0.07/0.67  | 0.09/0.55  | -0.09/0.54 | 0.09/0.56  | 0.30/0.05  | 0.19/0.20  |
| VAL | 0.03/0.86  | 0.21/0.17  | 0.33/0.03  | 0.42/0.00  | 0.09/0.56  | 0.22/0.14  | 0.11/0.47  | -0.04/0.78 | -0.14/0.38 | 0.12/0.41  | -0.03/0.87 | 0.04/0.79  | 0.21/0.17 | -0.01/0.96 | 0.05/0.73  | 0.14/0.37  | 0.30/0.05  | 0.20/0.19  | 0.16/0.30  |
| MET | 0.16/0.29  | 0.19/0.22  | 0.28/0.06  | 0.24/0.12  | 0.17/0.26  | 0.36/0.02  | 0.07/0.67  | 0.14/0.37  | 0.12/0.42  | 0.18/0.24  | 0.22/0.14  | -0.12/0.45 | 0.50/0.00 | 0.10/0.52  | 0.10/0.51  | 0.06/0.71  | 0.16/0.28  | 0.30/0.04  | 0.29/0.06  |
| ILE | 0.12/0.44  | 0.18/0.25  | 0.31/0.04  | 0.36/0.02  | 0.10/0.53  | 0.30/0.05  | 0.15/0.33  | 0.07/0.66  | -0.03/0.82 | 0.18/0.24  | 0.05/0.76  | 0.06/0.70  | 0.26/0.08 | 0.03/0.82  | 0.08/0.61  | 0.15/0.34  | 0.24/0.11  | 0.15/0.31  | 0.25/0.10  |
| LEU | 0.06/0.68  | 0.23/0.13  | 0.33/0.03  | 0.34/0.02  | 0.14/0.37  | 0.32/0.03  | 0.11/0.46  | 0.03/0.84  | -0.08/0.62 | 0.17/0.25  | 0.07/0.64  | 0.04/0.79  | 0.29/0.06 | 0.11/0.48  | 0.14/0.35  | 0.08/0.62  | 0.21/0.17  | 0.23/0.13  | 0.24/0.11  |
| ORN | 0.23/0.13  | 0.06/0.70  | 0.19/0.21  | 0.05/0.74  | 0.16/0.28  | 0.08/0.58  | 0.06/0.71  | 0.03/0.85  | 0.10/0.50  | 0.03/0.86  | 0.33/0.03  | -0.07/0.65 | 0.32/0.03 | 0.20/0.18  | 0.11/0.48  | -0.01/0.95 | 0.24/0.12  | 0.00/1.00  | 0.20/0.18  |
| PHE | -0.02/0.90 | 0.26/0.08  | 0.35/0.02  | 0.27/0.07  | 0.21/0.17  | 0.32/0.03  | 0.11/0.46  | 0.16/0.30  | 0.10/0.53  | 0.19/0.21  | 0.26/0.09  | -0.01/0.95 | 0.48/0.00 | 0.13/0.41  | 0.25/0.09  | -0.16/0.29 | 0.17/0.27  | 0.31/0.04  | 0.26/0.08  |
| LYS | 0.14/0.34  | 0.24/0.12  | 0.15/0.32  | 0.09/0.55  | 0.29/0.05  | 0.23/0.14  | 0.05/0.76  | 0.15/0.32  | 0.00/0.99  | -0.08/0.59 | 0.24/0.11  | 0.01/0.96  | 0.28/0.07 | 0.22/0.15  | 0.07/0.63  | 0.31/0.04  | 0.14/0.38  | 0.14/0.35  | 0.18/0.24  |
| TRP | 0.36/0.01  | 0.03/0.84  | 0.21/0.16  | -0.02/0.89 | 0.43/0.00  | 0.29/0.05  | 0.01/0.93  | 0.21/0.17  | -0.04/0.78 | 0.04/0.78  | 0.12/0.45  | 0.15/0.32  | 0.13/0.40 | 0.08/0.58  | -0.05/0.72 | 0.04/0.81  | 0.02/0.90  | -0.01/0.94 | -0.21/0.16 |

Supplementary Table 3: Output of spearman's rank sum correlation test for diarrhea group (FD & IBS-D). Values shown as Rho/significance value.

|       | PEA        | DOPA      | DA         | 3MT        | DOPAC      | HVA        | NE         | DHPG       | MHPG       | NM         | E          | MN         | VMA        | KYN        | 5.HTP      | 5.HT       | 5.HIAA     | AABA       | GABA       |
|-------|------------|-----------|------------|------------|------------|------------|------------|------------|------------|------------|------------|------------|------------|------------|------------|------------|------------|------------|------------|
| ASP   | -0.04/0.76 | 0.27/0.07 | 0.04/0.80  | 0.08/0.58  | -0.01/0.97 | 0.31/0.03  | 0.21/0.15  | 0.30/0.04  | -0.04/0.79 | 0.10/0.51  | 0.26/0.07  | -0.24/0.10 | 0.37/0.01  | 0.03/0.83  | 0.06/0.68  | 0.37/0.01  | 0.25/0.09  | 0.08/0.60  | 0.02/0.87  |
| GLU   | 0.29/0.05  | 0.14/0.33 | -0.17/0.25 | -0.08/0.60 | -0.01/0.92 | 0.15/0.30  | -0.03/0.84 | -0.11/0.46 | -0.23/0.12 | 0.13/0.39  | 0.20/0.16  | -0.02/0.88 | 0.32/0.03  | 0.15/0.31  | 0.01/0.93  | 0.17/0.24  | 0.11/0.45  | -0.03/0.82 | -0.05/0.76 |
| HyPro | -0.18/0.22 | 0.02/0.92 | 0.08/0.60  | 0.19/0.20  | -0.02/0.91 | -0.03/0.82 | -0.13/0.38 | -0.17/0.25 | -0.26/0.07 | 0.07/0.65  | -0.07/0.64 | -0.06/0.69 | -0.15/0.30 | 0.07/0.61  | 0.10/0.49  | -0.28/0.06 | 0.00/0.99  | 0.23/0.11  | 0.30/0.04  |
| SER   | 0.00/0.99  | 0.10/0.50 | 0.31/0.03  | -0.01/0.95 | 0.24/0.10  | 0.25/0.08  | -0.16/0.29 | 0.04/0.77  | -0.12/0.42 | -0.02/0.90 | -0.01/0.96 | -0.16/0.27 | 0.23/0.12  | 0.07/0.64  | -0.24/0.10 | -0.26/0.08 | 0.02/0.88  | 0.23/0.12  | 0.31/0.03  |
| ASN   | -0.17/0.25 | 0.31/0.03 | 0.23/0.11  | -0.06/0.66 | 0.21/0.15  | 0.33/0.02  | -0.23/0.11 | 0.13/0.38  | -0.18/0.23 | -0.27/0.06 | -0.08/0.57 | -0.36/0.01 | 0.19/0.20  | 0.09/0.55  | -0.10/0.52 | -0.11/0.46 | 0.21/0.14  | 0.11/0.47  | 0.29/0.05  |
| GLY   | -0.09/0.53 | 0.01/0.94 | 0.15/0.30  | 0.00/0.98  | 0.21/0.15  | -0.03/0.82 | -0.04/0.78 | 0.05/0.74  | 0.04/0.77  | 0.13/0.38  | 0.12/0.40  | 0.07/0.63  | 0.17/0.24  | -0.05/0.71 | -0.28/0.06 | -0.16/0.28 | -0.03/0.84 | 0.24/0.11  | 0.20/0.18  |

|     |            |            |            |            |            |            |            |            |            |            |            |            |            |            |            |            |            |            |            |
|-----|------------|------------|------------|------------|------------|------------|------------|------------|------------|------------|------------|------------|------------|------------|------------|------------|------------|------------|------------|
| GLN | -0.09/0.54 | 0.30/0.04  | 0.19/0.20  | 0.07/0.62  | 0.12/0.41  | 0.12/0.42  | 0.04/0.81  | 0.30/0.04  | 0.10/0.49  | 0.02/0.91  | 0.21/0.16  | -0.31/0.03 | 0.17/0.24  | -0.06/0.71 | -0.20/0.18 | -0.16/0.27 | 0.11/0.45  | 0.24/0.11  | 0.16/0.27  |
| HIS | -0.30/0.04 | 0.29/0.05  | 0.07/0.63  | -0.10/0.50 | 0.21/0.15  | -0.08/0.61 | -0.18/0.23 | 0.11/0.45  | -0.16/0.29 | -0.31/0.03 | -0.03/0.85 | -0.32/0.03 | 0.09/0.54  | 0.25/0.08  | 0.19/0.19  | -0.07/0.62 | 0.20/0.17  | 0.14/0.34  | 0.15/0.31  |
| TAU | -0.12/0.42 | 0.21/0.15  | 0.10/0.50  | 0.06/0.67  | 0.05/0.75  | 0.24/0.10  | 0.23/0.12  | 0.31/0.03  | 0.09/0.56  | 0.10/0.52  | 0.30/0.04  | -0.22/0.13 | 0.33/0.02  | -0.02/0.91 | 0.16/0.29  | 0.36/0.01  | 0.22/0.14  | 0.17/0.26  | 0.03/0.85  |
| CIT | 0.15/0.32  | -0.14/0.33 | -0.11/0.45 | -0.14/0.36 | 0.36/0.01  | 0.19/0.21  | 0.07/0.65  | 0.03/0.83  | -0.02/0.91 | 0.14/0.36  | 0.26/0.07  | -0.07/0.62 | 0.29/0.04  | -0.02/0.90 | -0.14/0.33 | 0.04/0.81  | 0.08/0.58  | 0.21/0.14  | 0.03/0.82  |
| THR | -0.01/0.94 | 0.20/0.16  | 0.13/0.39  | -0.07/0.63 | 0.08/0.60  | -0.01/0.92 | -0.48/0.00 | -0.16/0.26 | -0.35/0.02 | -0.35/0.01 | -0.13/0.38 | -0.28/0.05 | -0.03/0.85 | 0.08/0.59  | -0.18/0.23 | -0.16/0.27 | -0.03/0.82 | 0.10/0.49  | 0.16/0.27  |
| ALA | 0.02/0.90  | 0.59/0.00  | 0.08/0.59  | -0.02/0.89 | -0.09/0.54 | 0.13/0.40  | -0.07/0.64 | -0.15/0.29 | -0.26/0.08 | -0.08/0.59 | 0.04/0.81  | -0.27/0.06 | 0.13/0.39  | 0.27/0.06  | 0.03/0.82  | -0.11/0.45 | 0.27/0.06  | -0.01/0.96 | -0.04/0.77 |
| ARG | -0.24/0.11 | 0.10/0.52  | 0.24/0.10  | 0.04/0.79  | 0.21/0.14  | 0.19/0.20  | -0.09/0.52 | 0.14/0.35  | -0.12/0.41 | -0.14/0.33 | 0.09/0.53  | -0.33/0.02 | 0.05/0.75  | 0.00/1.00  | 0.01/0.92  | -0.08/0.59 | 0.07/0.62  | 0.17/0.24  | 0.19/0.19  |
| PRO | 0.03/0.83  | 0.31/0.03  | 0.20/0.18  | 0.14/0.36  | -0.01/0.96 | 0.11/0.45  | -0.13/0.37 | -0.16/0.28 | -0.35/0.02 | -0.06/0.66 | -0.04/0.77 | -0.17/0.24 | 0.02/0.89  | 0.05/0.75  | -0.02/0.87 | -0.09/0.54 | 0.09/0.55  | -0.08/0.58 | 0.27/0.06  |
| TYR | 0.02/0.91  | 0.36/0.01  | 0.07/0.64  | -0.14/0.33 | 0.02/0.90  | 0.31/0.03  | -0.13/0.36 | 0.00/0.99  | -0.08/0.61 | -0.02/0.89 | -0.05/0.74 | -0.32/0.03 | 0.26/0.08  | 0.13/0.39  | 0.06/0.69  | 0.08/0.59  | 0.11/0.47  | -0.12/0.43 | 0.29/0.05  |
| VAL | -0.04/0.80 | 0.34/0.02  | 0.10/0.52  | 0.03/0.82  | -0.07/0.61 | 0.25/0.08  | -0.10/0.48 | -0.04/0.77 | -0.23/0.11 | 0.04/0.77  | 0.02/0.88  | -0.11/0.46 | 0.12/0.43  | 0.17/0.25  | 0.12/0.43  | -0.11/0.46 | 0.10/0.51  | -0.18/0.23 | 0.13/0.36  |
| MET | -0.04/0.79 | 0.47/0.00  | 0.10/0.50  | -0.04/0.78 | 0.26/0.08  | 0.30/0.04  | -0.10/0.49 | 0.11/0.47  | -0.08/0.58 | -0.03/0.83 | 0.09/0.53  | -0.20/0.16 | 0.32/0.03  | 0.37/0.01  | 0.08/0.61  | 0.13/0.37  | 0.24/0.10  | -0.17/0.23 | 0.13/0.37  |
| ILE | -0.06/0.68 | 0.33/0.02  | 0.08/0.60  | 0.04/0.79  | -0.01/0.95 | 0.28/0.05  | -0.11/0.46 | 0.03/0.86  | -0.21/0.14 | 0.05/0.74  | 0.12/0.43  | -0.03/0.83 | 0.13/0.38  | 0.27/0.07  | 0.23/0.12  | 0.01/0.92  | 0.04/0.77  | -0.15/0.29 | 0.22/0.14  |
| LEU | -0.16/0.27 | 0.32/0.03  | 0.07/0.63  | 0.02/0.89  | 0.06/0.68  | 0.36/0.01  | -0.10/0.51 | 0.08/0.59  | -0.11/0.45 | 0.05/0.71  | -0.01/0.96 | -0.07/0.66 | 0.21/0.15  | 0.19/0.21  | 0.19/0.19  | 0.06/0.67  | 0.11/0.45  | -0.13/0.38 | 0.28/0.05  |
| ORN | 0.27/0.06  | 0.19/0.20  | 0.23/0.12  | 0.05/0.74  | 0.10/0.48  | 0.10/0.48  | -0.15/0.31 | -0.21/0.15 | -0.37/0.01 | 0.20/0.18  | -0.03/0.87 | -0.14/0.34 | 0.12/0.44  | 0.19/0.19  | -0.01/0.95 | -0.04/0.77 | 0.13/0.38  | 0.11/0.47  | 0.24/0.11  |
| PHE | 0.06/0.68  | 0.41/0.00  | 0.09/0.56  | -0.08/0.58 | 0.02/0.90  | 0.25/0.09  | 0.17/0.25  | 0.26/0.07  | 0.05/0.73  | 0.15/0.31  | 0.23/0.12  | -0.16/0.28 | 0.41/0.00  | 0.36/0.01  | 0.24/0.10  | 0.13/0.38  | 0.07/0.63  | -0.05/0.74 | 0.01/0.94  |
| LYS | -0.09/0.56 | 0.22/0.14  | -0.03/0.83 | -0.16/0.29 | 0.26/0.08  | 0.04/0.79  | -0.23/0.12 | -0.15/0.30 | -0.14/0.34 | -0.17/0.25 | 0.02/0.89  | -0.26/0.08 | 0.10/0.48  | 0.37/0.01  | 0.27/0.07  | -0.18/0.23 | 0.05/0.73  | 0.09/0.53  | 0.08/0.58  |
| TRP | 0.49/0.00  | 0.16/0.29  | 0.15/0.29  | -0.16/0.28 | 0.10/0.51  | 0.03/0.84  | 0.04/0.76  | -0.03/0.87 | -0.04/0.77 | -0.04/0.79 | -0.04/0.77 | -0.08/0.59 | 0.14/0.33  | 0.05/0.72  | -0.08/0.60 | 0.09/0.53  | 0.00/1.00  | -0.07/0.65 | -0.37/0.01 |
